# Supplementary material for: Stability of gut microbiome after COVID-19 vaccination in healthy and immuno-compromised individuals
Source: PubMed Central journal article supplement (PMC10844540; doi:10.26508/lsa.202302529), 2024-02-05
Supplement: LSA-2023-02529_review_history.pdf [file LSA-2023-02529_review_history.pdf]

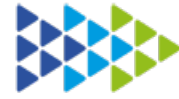

Life Science Alliance

# Stability of gut microbiome after COVID-19 vaccination in healthy and immuno-compromised individuals

Rebecca Boston, Rui Guan, Lajos Kalmar, Sina Beir, Emily Horner, Nonantzin Beristain-Covarrubias, Juan Carlos Yam-Puc, Pehuén Pereyra Gerber, Luisa Faria, Anna Kuroshchenkova, Anna Lindell, Sonja Blasche, Andrea Correa-Noguera, Anne Elmer, Caroline Saunders, Areti Bermperi, Sherly Jose, Nathalie Kingston, CITIID-NIHR COVID-19 BioResource Collaboration, Sofia Grigoriadou, Emily Staples, Matthew Buckland, Sara Lear, Nicholas Matheson, Vladimir Benes, Christine Parkinson, James Thaventhiran, and Kiran Patil

**DOI:** <https://doi.org/10.26508/lsa.202302529>

*Corresponding author(s): Kiran Patil, University of Cambridge and James Thaventhiran, University of Cambridge*

---

|                         |                     |            |
|-------------------------|---------------------|------------|
| <b>Review Timeline:</b> | Submission Date:    | 2023-12-13 |
|                         | Editorial Decision: | 2023-12-19 |
|                         | Revision Received:  | 2023-12-27 |
|                         | Accepted:           | 2023-12-29 |

---

*Scientific Editor: Eric Sawey, PhD*

## Transaction Report:

(Note: With the exception of the correction of typographical or spelling errors that could be a source of ambiguity, letters and reports are not edited. The original formatting of letters and referee reports may not be reflected in this compilation.)

Please note that the manuscript was previously reviewed at another journal and the reports were taken into account in the decision-making process at *Life Science Alliance*.

December 19, 2023

RE: Life Science Alliance Manuscript #LSA-2023-02529-T

Dr Kiran Raosaheb Patil  
University of Cambridge  
MRC Toxicology Unit  
Tennis court road  
Cambridge, Cambridgeshire CB21QR  
United Kingdom

Dear Dr. Patil,

Thank you for submitting your revised manuscript entitled "Gut microbiome remains stable following COVID-19 vaccination in healthy and immuno-compromised individuals". We would be happy to publish your paper in Life Science Alliance pending final revisions necessary to meet our formatting guidelines.

Along with points mentioned below, please tend to the following:

- please upload your main manuscript text as an editable doc file
- please upload your main and supplementary figures as single files
- please add ORCID ID for the corresponding (and secondary corresponding) author--you should have received instructions on how to do so
- please add a Summary Blurb/Alternate Abstract to our system
- please add Keywords and a Category for your manuscript to our system
- please add the Twitter handle of your host institute/organization as well as your own or/and one of the authors in our system
- please consult our manuscript preparation guidelines <https://www.life-science-alliance.org/manuscript-prep> and make sure your manuscript sections are in the correct order
- please add authors' contributions to the system as well
- Tables should be uploaded in editable .doc or excel format and included at the bottom of the main manuscript file or sent as separate files.
- please add your main, supplementary figure, and table legends to the main manuscript text after the references section
- please update the Data Availability statement to include accession information for the sequencing data. The GitHub link also needs to be updated.

If you are planning a press release on your work, please inform us immediately to allow informing our production team and scheduling a release date.

LSA now encourages authors to provide a 30-60 second video where the study is briefly explained. We will use these videos on social media to promote the published paper and the presenting author (for examples, see <https://twitter.com/LSAJournal/timelines/1437405065917124608>). Corresponding or first-authors are welcome to submit the video. Please submit only one video per manuscript. The video can be emailed to [contact@life-science-alliance.org](mailto:contact@life-science-alliance.org)

To upload the final version of your manuscript, please log in to your account: <https://lsa.msubmit.net/cgi-bin/main.plex>  
You will be guided to complete the submission of your revised manuscript and to fill in all necessary information. Please get in touch in case you do not know or remember your login name.

To avoid unnecessary delays in the acceptance and publication of your paper, please read the following information carefully.

#### A. FINAL FILES:

These items are required for acceptance.

-- An editable version of the final text (.DOC or .DOCX) is needed for copyediting (no PDFs).

-- High-resolution figure, supplementary figure and video files uploaded as individual files: See our detailed guidelines for preparing your production-ready images, <https://www.life-science-alliance.org/authors>

-- Summary blurb (enter in submission system): A short text summarizing in a single sentence the study (max. 200 characters including spaces). This text is used in conjunction with the titles of papers, hence should be informative and complementary to the title. It should describe the context and significance of the findings for a general readership; it should be written in the present tense and refer to the work in the third person. Author names should not be mentioned.

## B. MANUSCRIPT ORGANIZATION AND FORMATTING:

Full guidelines are available on our Instructions for Authors page, <https://www.life-science-alliance.org/authors>

We encourage our authors to provide original source data, particularly uncropped/-processed electrophoretic blots and spreadsheets for the main figures of the manuscript. If you would like to add source data, we would welcome one PDF/Excel-file per figure for this information. These files will be linked online as supplementary "Source Data" files.

**\*\*Submission of a paper that does not conform to Life Science Alliance guidelines will delay the acceptance of your manuscript.\*\***

**\*\*It is Life Science Alliance policy that if requested, original data images must be made available to the editors. Failure to provide original images upon request will result in unavoidable delays in publication. Please ensure that you have access to all original data images prior to final submission.\*\***

**\*\*The license to publish form must be signed before your manuscript can be sent to production. A link to the electronic license to publish form will be available to the corresponding author only. Please take a moment to check your funder requirements.\*\***

**\*\*Reviews, decision letters, and point-by-point responses associated with peer-review at Life Science Alliance will be published online, alongside the manuscript. If you do want to opt out of having the reviewer reports and your point-by-point responses displayed, please let us know immediately.\*\***

Thank you for your attention to these final processing requirements. Please revise and format the manuscript and upload materials within 7 days.

Thank you for this interesting contribution, we look forward to publishing your paper in Life Science Alliance.

Sincerely,

Eric Sawey, PhD  
Executive Editor  
Life Science Alliance  
<http://www.lsajournal.org>

-----

December 29, 2023

RE: Life Science Alliance Manuscript #LSA-2023-02529-TR

Kiran Patil  
University of Cambridge  
United Kingdom

Dear Dr. Patil,

Thank you for submitting your Research Article entitled "Stability of gut microbiome after COVID-19 vaccination in healthy and immuno-compromised individuals". It is a pleasure to let you know that your manuscript is now accepted for publication in Life Science Alliance. Congratulations on this interesting work.

The final published version of your manuscript will be deposited by us to PubMed Central upon online publication.

Your manuscript will now progress through copyediting and proofing. It is journal policy that authors provide original data upon request.

Reviews, decision letters, and point-by-point responses associated with peer-review at Life Science Alliance will be published online, alongside the manuscript. If you do want to opt out of having the reviewer reports and your point-by-point responses displayed, please let us know immediately.

\*\*\*IMPORTANT: If you will be unreachable at any time, please provide us with the email address of an alternate author. Failure to respond to routine queries may lead to unavoidable delays in publication.\*\*\*

Scheduling details will be available from our production department. You will receive proofs shortly before the publication date. Only essential corrections can be made at the proof stage so if there are any minor final changes you wish to make to the manuscript, please let the journal office know now.

**DISTRIBUTION OF MATERIALS:**

Authors are required to distribute freely any materials used in experiments published in Life Science Alliance. Authors are encouraged to deposit materials used in their studies to the appropriate repositories for distribution to researchers.

You can contact the journal office with any questions, [contact@life-science-alliance.org](mailto:contact@life-science-alliance.org)

Again, congratulations on a very nice paper. I hope you found the review process to be constructive and are pleased with how the manuscript was handled editorially. We look forward to future exciting submissions from your lab.

Sincerely,

Eric Sawey, PhD  
Executive Editor  
Life Science Alliance  
<http://www.lsajournal.org>
